# Supplementary material
Source: PubMed Central journal article supplement (PMC3958055)
Supplement: JVI.02863-13_zjv999098721so1.pdf [file JVI.02863-13_zjv999098721so1.pdf]

Predicted TgERV-F provirus consensus sequence

**5'LTR**

TGTGGTAGATAGGGACAGCGGACGCGGAAGATCACGGGATGTCACGGAAGATAGACCCCTCCCCCTCTCTCTCCCCACGTTATCTATTAACCCAGAA < 100

GCCCCAGAAGAATGTAGCCACACCTGCCCTAGTAAATTTCCACTACCCGACTAACCCCTGAGACCCCCAACCCCTCTGACGTAGCAAAGACCCCAA < 200

**poly-A signal**

AACTATTTAAACCCACGAGATAGGATAATAAACGCTTTTCAACCGTCTGCCATATTGGTGTCTGCGTGTGATTAGCCCGAGTGGCCTGGACGAGACC < 300

**End of 5'LTR PBS**

AGGCCCGCGTCTGCCACCTGAACCAGTCCCTGGTTGTCTTTTCATAAAGGCAACATACGTTGGTCCGAAACCCGGGACAAAAGAAGAAAAAAGGAAA < 400

AATTCGCCCCGCTGACGGGATACACCTGGACAGAAGCAGCGGCCGGAACGGTACAGCCGTATCTAGCGTAGGGGAGACGTCGCCGGGATCCGCGGGCGTC < 500

**Gag**

SD

**M domain**

ATGGACGCAATGGCAAGGATCGTAAGTGTATTTATTCGCAGTGGGGTATTGGGTGTAAGTCAAGGATTTTCATCTTGCCATAGCGAGATTGCTTGAGC < 600  
M D A M A R I V S A I Y S Q W G I G C K L K D F H L A I A R L L E L

TAGGGCAATCGAGCGTCCCGTGGATGTATTACATCCGAAATATGGGAAAAATGCACTGCCGCGTAGCCGAGGACACAAAATCCTCAGGCAGCGGCAA < 700  
G A I E R P V D V L H P E I W E K C T A A L A E D T K S S G S G K

AAATCTTAAAGCATGGGGCAAAGTAGAGAAAGCCCTACGCAAGCGATAGAAGAGCAGGAGACATGGACCGCGCGCGCACGTTTATTAGTTACTCCC < 800  
N L K A W G K V E K A L R K A I E E Q E T W T A A R T C L L V T P

AAACTCGGGTGGGGCGGGGACGCACTGCCCTGAGAGCGATCTGCCCGCAGCGGGGACCCGGGGGGCTCAGCGGACACCCGCTCCCCAGATC < 900  
K L G V G A G T Q T A P E S D L P G S G D P G G L S A T P A P P D Q

AGAGCCCACCCCGCGAGGAACCCCGCGACACCCCGCGCGGAAATCCCAAAAACCCCGCTCAAACCCCGGAGAGACCGCAATTC < 1000  
S P P P P A G T P R D T P A A E N P Q K P P T A Q T P R E T A N S

CTCCGAGCGCGCGCGCGCCCGCGATCCGATGTCGGAGACGCAACAGCAGCGGAGCGCTTCTGGCAAGGGCTGCTAAAAGAAGCCGAGCGCC < 1100  
S E P P P P P A R D P M S E T Q Q H A E R F W Q G L L K E A R A A

**L domain**

GAAACCGCGCTTGGGAAGACGGCGGCCATGCGCCTCCCTACCCCTTTGAAAATGGCGCCGGGAGCGGCAGAGGGGGGGCTCGGGCGGTCCCG < 1200  
E T A A W E D G A A M P P P Y P F E N G A G S G R E G R G S G G P G

GCGGAACACCCGGGAGGAGCGGATCTCGGGAATGCGCGCGCGGGAGAAAGGGCGGAGAGCGGCACAGAGCGGAACCAACCAGCAGCCCGCGG < 1300  
A N T R E E R D L G N A R A R E K G A E S G T E R G T N Q Q P R R

GAACTGCCACCATATAAGGGAGAAACACCCCGCGAGAGCGCGGAGCCGGGGGGCGGAGCGCGCCACCCCGGGGAGGAGCGGAGCTCGG < 1400  
K L P P Y K G E T T P R E R R G E P G G R E R R H P H G E E R A R

GGCCGAACAAACGGCACGGAGCCCGGAAGTGCCTGGCACTCGTCTCCGGCTCGGAGACCAGCAACAGCTCCACCAGCTCAGAGGAGCTGACGGAGG < 1500  
G R T K R H G A P E V H W H S S S G S E T S N S S T S S E E L T E A

CTAGCGATGGTCCGAGACGGACGAAACCGGACAGCTTGAACAAAGCCGAGTAAAGCTCTAAGCCGCGCGAAAAACAATAACGAACC < 1600  
S D G S E T D E T E P A Q L E T K P S K A L S R A E K Q L Q Y E P

AGCCAGTTTACTGACTGGGGAAAAATAAAGATAGCTTGTGCTGAATGGTCCCCAGCGCGCCATACAAGCCTTCCCGGTACGGCTTACCGTCCGGAA < 1700  
A Q F T D W G K I K I A C A E W S P A A A I Q A F P V R L T G P E

GGGAACCAACAAGGTATATACCCCGATAAACCCAAAGGATATACAGTCAATGTCAAAGCCATTCAGAAAAAGGGATCAACTCGGCTATAGTCACTA < 1800  
G N Q Q R V Y T P I N P K D I Q S I V K A I A E K G I N S A I V T T

CGTTAATCGATGGTCTTTTAGCAACGATGACTTGCTTCCCTTTGATATCGAACGGATAGGGCGTATGATACTGACGGGGCGGAAATGATCGTCTTAG < 1900  
L I D G L F S N D D L L P F D I E R I G R M I L D G A G M I V F R

GCAGGAATGGGAGGATAATTGTAGAAAAGCAGTAGCCCAAGCGTCCGGCGCGGGCAGCCACTACACAGATCGAGCTTATCCAGACTGATAGGAAAGCAT < 2000  
Q E W E D N C R K Q L A Q A S G A R Q P L H R S S L S R L I G K H

GATGATATGATCACACCACAGCAGCAAGCTGCACAGATGCAGGCTGAGGAGGTCAGAGCGACCCTCGGGCTGCTAGAGAGGCTATTTCGCGCCGCTCCC < 2100  
D D M I T P Q Q Q A A Q M Q A E E V R A T T R A A R E A I R A A S R

GAGTCGTGGCCAAGCCGGCACCCTGGTCCACCGTGAGGCAGGCAGAGAGCGAAAGCTTCACACAGTTCTGTAGATCGCCTGCAGGCAGCGATAGACTCCTC < 2200  
V V A K P A P W S T V R Q A E S E S F T Q F V D R L Q A A I D S S

CACCTGCGCGCAGAGGCAAGGGGCCCGTGGTGGCCGACTGCCTGCGCCAGCAGTCAACTCTGTTACCAAGGATATCTTACGCTCCCTGCCAGCCGGA < 2300  
T L P A E A R G P V V A D C L R Q Q C N S V T K D I L R S L P A G

**zinc finger 1**

GCTAGCCTGGGTGACATGATCAGACACGTAGTGAGGGAGGAACACCTGACGCCCATTCAGGCAGCTGTCCACACCCGTACCAATGCCATGGCTGTTTCA < 2400  
A S L A D M I R H V V R E E H L T P I Q A A V H T L T N A M A C F K

**zinc finger 2**

AGTGCGGGGAGGGGGTACATCGCGGTGAGCTGCCACAGCCGGCAGCGGGCCCGCAGCGCCTCCGCCCAAACACGCCCCGGGGATCTCTGCTG < 2500  
C G E A G H I A V S C P Q P A R R P A A A P P P Q T R P R G S C W

GGGCTGCGGGAGGAAGGACATCTGGCTAGGGAATGCAGGTCCCGGCTCCAGGAAACGGAAGGGGAGGGGGCCCGGGCCGACCCAGCCTCTCCTCC < 2600  
G C G R K G H L A R E C R S R L Q G N G K G R G P A G R T Q P P P

**Pro**

GCTGCAATATGAGGCGGCCCATCCATGCCAACCCCAATGGAGCGGGGAGCCCTCGTACCCCATTTCTCCACAGGAAGCAGCCAACTTCATACCCCTGC < 2700  
M E R G A L V P H S P T G S S Q L H T P A  
A A N M R R P I H A N P Q W S G E P S Y P I L P Q E A A N F I P L P

CAGCGAGTATCACGGCACAGCCTGCGGCGCCTTCGTACCCACCGCCACCGCAAGCAGCGCCTGTGCCACAGGGTCAGCAGGGGGCGCCCGAAGGGGAC < 2800  
S E Y H G T A C G A F V P T A T A S S A C A T G S A G G A P E R D  
A S I T A Q P A A P S Y P P P P Q A A P V P Q G Q Q G A P Q N G T

AACCCCTGGGTGGCCCTGGCCCTAAAAATAGGGAAGGAACCCCGAAAGTTTGGGGGACATGCCGCCTCTATGGCAGTCGGGACCCCATGTAATAGGGC < 2900  
N P W V A L A L K I G K E P P K V W G T C R L Y G S R D P H V I G L  
T P G W P W P \*

**catalytic site**

TTCAAGTTTGGGACAGACAGGAGCAGACTGCACAATCCTACCCCAAGCCCTATGGCCCGACACTGGCAGTACAAGGAAGTCCCCCAGTGAACGGGGT < 3000  
Q F W A D T G A D C T I L P Q A L W P R H W Q Y K E V P P V N G V

GGGAGGGCTGTCCCGAGCTTGAAAAGCACCCAATTGGTAGCTATAACGCTCCATACAAAAGAAAGGACCAGAACAACAGTAGCAATCCACCCCTATATC < 3100  
G G L S R A W K S T Q L V A I T L H T K K G P E Q T V A I H P Y I

**Pol**

TTGCAAAACTCCCACCCCTGATAGGAAGGACATCCTCGCCATGCTAGGAGTCAGGATTACAATTTATAATGAGGGCCACTGCTGTGCACCCACTGCT < 3200  
L Q N S P P L I G R D I L A M L G V R I T N L \* M R A T A V H P L L

GCCAATCAAAGTACTTGGAAATCACCAGACCCCGTATGGGTTGAGCAGTGGCCCTGTCAAAGCCTCGAATGACAGCCTTGCTGGAAGTGGTCGACCCGC < 3300  
P I K L T W K S P D P V W V E Q W P L S K P R M T A L L E L V D R

GAGCTACAAAAGGGCCACATCGAACCCCTCCACAGCCCGTGAACACCCCTGTGTTTGTAAATCCCCAAGAGATCAGGAGAAGGCTACCGCCTCGTCCACG < 3400  
E L Q K G H I E P S T S P W N T P V F V I P K R S G E G Y R L V H D

ACCTGAGGGAAGTAACAAGACAATTCAGCCCATGGGTCAGTTTCAGACACTACTGCCCGCAACTCAGCCATCCCCGAAGGGCAGCCGTGCGCAGTGTCT < 3500  
L R E V N K T I Q P M G P V Q T L L P A N S A I P E G Q P C A V L

GGACATCAAAGACTGCTTCTTTTCAATACCCCTGCATGCCGAGGACAAAGAAGGTTTCGCCTTCTCCATCGTGTCCCGAACGGCGAGGCACCTAACCTC < 3600  
D I K D C F F S I P L H A E D K E R F A F S I V F P N G E R P N L

CGCTTCCAATGGAAGGTGCTACCTCAAGCCCTTGTTGACAGCCCGACCATATGCCAGATCACCGTGGACAGGGCAGTGTGCCAGTCCGACACTCCCACC < 3700  
R F Q W K V L P Q G L V D S P T I C Q I T V D R A L M P V R H S H P

**RT catalytic site**

CTGCTGCCACCATCATTCAGTACATGGACGACATCCTCGTCGCCGCCACCATCGGCAGGCCAAGTGGATCACCTAGTGTCCACGATCAGGAAACCCCTCA < 3800

A A T I I Q Y M D D I L V A A P S A G Q V D H L V S T I T E T L Q

GGCCAACGGCTTCGAGATCGCGAACACGAAGATCAAGAGAGGACCGTGCGTGACCTTCTGGGAGTGGGGATCACAACCTCCTACGTGACCCACCCAAG < 3900  
A N G F E I A N T K I K R G P C V T F L G V G I T N S Y V T P P K

ATAAAGTCCGCCGAGACATCAAGACCTCCACGACATGCAACGACTCGTAGGATCTCTGCAGTGGCTCCGCAACATCATCCTAGTTCGCCAGAGGTCA < 4000  
I K V R R D I K T L H D M Q R L V G S L Q W L R N I I L V P P E V M

TGGACCCCTGTATGACCTCTGAAAGGAAAACACCGTGGGACCCCAAGGAGCTGACGCCGAAGCAACGAAATCCCTCGACTTCATCGAACGTGAGAT < 4100  
D P L Y D L L K G K H P W D P K E L T P Q A T K S L D F I E R Q M

GTCCACCAGCCTGCTTGCCAGGTGGAACCCGGGCGTACCCTGGACTTATACGTCCACTTCACGCAGAAGGGAGGAGTGGGAGCACTTGCCCAAGGACCT < 4200  
S T S L L A R W N P G V P L D L Y V H F T Q K G G V G A L A Q G P

TCCGAAAAATCCAGCCGATCCAGTGGTGGTCTCGGAAGACCGACTCACGCATTCTCCCGAGGAGTGGAGTGCATTGCTAACCTCATCACGAAAGGCA < 4300  
S E K S Q P I Q W V V L G R P T H A F S P G V E C I A N L I T K G R

GGAGACTCGCCCTGAGACACCTGGGAACCGAGCCGGCAAGGATCCACCTCCCTTCCGCAAGCGACCGACCACGGAGTCAACTGCAATATCGGAGCACCT < 4400  
R L A L R H L G T E P A R I H L P F R K R P T T E S T A I S E H L

GGCCCTCGCTCTACCCGGCTTCGGAGGAGAAATCTCCTACGCCACCAAAACCCTGGACCCAGCTACTGACCATTGTCGACATAGATGTCCACCGAAG < 4500  
A L A L T G F G G E I S Y A T K P P W T Q L L T I V D I D V P P K

GTCATGGACCGCAACCAGGACCAACGGTCTTTACAGAGCCTCCTCCATGACTTCTACCGCAGCAGCAGTGTGGCAGGAGGAGAAACATGGCATT < 4600  
V M D R P Q P G P T V F T D A S S M T S T A A A V W Q A G E T W H C

CGCTCAAAACGTGTGACCCACGCTGTCAGTGC AACAGCTGGAAGCAGCAGCAGTGGTCTTGGCATGCGGACTTTTCCAGGACGAAACACCTCAACATCGT < 4700  
V K T C D P T L S V Q Q L E A A A V V L A C G L F Q D E H L N I V

GACAGACTCTATATTCGTGGCAAAGCTCTGCCTAGCCATGTCAAGACCAGGTGTGTCAACATCCACGACGGCCTCCATGCTTGAAGAGGCACTCTCCTCA < 4800  
T D S I F V A K L C L A M S R P G V S T S T T A S M L E E A L S S

CGCCAGGACCGCTGTCGTCATCCAGTCAACAGCCATAACCCAGTCAAGGGCTTCTTCCAGACTGGCAACGACAAAGCAGATGCCGACGCAAGGGAG < 4900  
R Q G T V S V I H V N S H N P V K G F F Q T G N D K A D A A A K G V

TGTGGACTGCAGGAAGCTCGTCAGTGCACGAGTCACTCCACATAGGGCCAAAGCACTGGCAAAAAGATGCGGGATCTCGACAGCAGACGCGAGACA < 5000  
W T L Q E A R Q L H E S L H I G A K A L A K R C G I S T A D A R H

CGTAGTGGCCACTGCCCTCACTGCCAGAAGTCACCCCTATGGACCGGTGGAGTCAACCCGAGGGCCCTCAAGGGTCAAGAAATCTGGCAGTCAGACTTC < 5100  
V V A T C P H C Q K S P L W T G G V N P R G L K A S E I W Q S D F

ACCTCTGCGAATGCTGAAGCCCGAGCATGGCTTGACAGTGCAGTGGACACCTACAGCGGAGTATCATAGCGACACAGCATCTCAAACCCAATCGA < 5200  
T L C E L L K P R A W L A V T V D T Y S G V I I A T Q H L K P N S K

AGGCCACGATCCAGCACTGGCTGACAGTTATGGCATGGCTTGGTATCCCAAGCAAATTAAGCACTGCAATGCTTCCAATTTTATCTCCAATCAGTGGC < 5300  
A T I Q H W L T V M A W L G I P K Q I K T D N A S N F I S K S V R

AGAATTCGCCTCAGTGTGGGTATCACCTTAGCACAGGGAATCCCATATAACAGCACCGGACAGGCCATTGTCGAGCGAGCAATCAGACCCATAAAGCC < 5400  
E F A S V W G I T L A Q G I P Y N S T G Q A I V E R A N Q T L K A

AAGTTAGAAGTGTGGCAAAGGCAGAGGGCTTTGCCAATCCATCCCTCAGGAGACCAGACACGCATGTAGCAACCGCGCTGCTAGCACTGAACCAAT < 5500  
K L E V L A K A E G F A N S I P S G D Q T R M L A T A L L A L N Q F

TCCCTAGGGGAGATGAAGCAAACAGTCCCATTCGAAAACTGGGCCACCCAGACACTAGAGGAGGGCCACAGGTCATGGTCAAAAACGAGCTAGGCGA < 5600  
P R G D E A N S P I R K H W A T Q T L E E G P Q V M V K N E L G E

GTGGAAACGGGGCTGGAGACTGGTCTTACGGGACGGGGTACGGGAGTAAAAAGGAGGCAAGATCAGGTGGTGTCCACTCAGGTGATCAAACCT < 5700

W E R G W R L V L T G R G Y A A V K K E G K I R W C P L R S I K P

**Env -- SU SA**

GACCTTAAGAAATGAAACTAATGGAAAAGTGTAGTTTTTCGTTTCGAGGACACGCTCGTGGACCGTCCCCGCGACACACACCCCTGCTCCAGAGAGAGA < 5800  
D L K N E T N G K L \* R S Q D T L V D R P R D T H T P A P E R D

TAACGGACCACCAAGCCACCAGACAGAACCTGAGCGTCCCACGGCGGTGAGACCCAGACATGCACAGTGTCTCTGTGCAATCCTGCTGCTGGGGTTTGTG < 5900  
N G P P S H Q T E P E R P T A V R P R H A Q C L C A I L L L G F V

GCCGGGGGCAAGCCGACCCAGGCCACTACCTCACCAGCCGTTTCAGATGGGTCATGCAACATCTTTCAAGTGACAAGGTGTTCAAAGAGGTCAACACCG < 6000  
A G G Q A D P G H Y P H Q P F R W V M Q H L S S D K V F K E V T T A

CAAACGCTCCATCCTTCGTATTCCACATAGCCGATCTGTTTCCAGGGCAACCGAAAATACGGCCCTCAAGCCACACATCATACTCATGTACATATCTTA < 6100  
N A P S F V F H I A D L F P G Q P K I R P S S P H I I L M Y I S Y

CTGGTGCCAGCGTCCAACCCAGGAAAAGTACTGTGACTACCCGGGTGGGGACATTGTGGATATTGGGGCTGCGAAAACATTGTTACAGATGCCAGA < 6200  
W C P A S N P G K R Y C D Y P G W G H C G Y W G C E T I V T D A R

CCATGGGAGACGGGTGGCAACCCGAGGAGCCGACAAATCTTACAGTTCACTGGGCACCCCTTTGGCTGCGGAGACCACAATGCACAGCCTAGACAAC < 6300  
P W G D G W Q P Q E P D K F L Q F T W A P F G C G D H N A Q P R Q R

GGGGATGCGTAAGTTATAACATGACTGTCTACAGCCAGATCACCCTAGCTGGGCCACGGGTAGAACATGGACAGTGGTCTCAGAGGACCGAGGAGGTG < 6400  
G C V S Y N M T V L Q P D H P S W A T G R T W T V V L R G P R R W

GGTGAATGTGAGAATTATCAGGCTCCAGCCGCAACACCTCGACCAGTGGGACCCAACAAAATTATCAAGAATGTGCTGAGAGGGAAAAACACAACCCAC < 6500  
V N V R I I R L Q P P T P R P V G P N K I I K N V L R G K N T T H

CCCCAAACCCCTGACCCAAAAGCCACTGACACCCCGACCAGCCTTGAGATACCCCCAGATAGGCCGACGGCTGAGTCAGACCCAAAACCAATCTTTC < 6600  
P K T L T P K A T D T P T S L A D T P Q I G R T A E S D P N P I F R

**isomerization motif**

GTATGCTAGAAGCTACCTTCTAACCCCTAAACGAAACCAACCAACCTAACTAATCTGTTGGCTTTGCTATGATATCAAACCCCTTTTATGAAGG < 6700  
M L E A T F L T L N E T K P N L T N S C W L C Y D I K P P F Y E G

CATTGCTTTGGACACCCCTTCAGTTACTCCACAGCCAGCGCCCCACCAGTGCAGATGGGACACTCCCCGAGAGGAATCACCCCTGAGTCAAATCACA < 6800  
I A L D T P F S Y S T A S A P H Q C R W D T P R R G I T L S Q I T

GGACAGGCAGATGTTTGGGAATGCAACCTTAGCAAAGCAGAAAGGCAACTTCTGCATAAAGTTGTCAAACCAACGAAAACTAAACAGTGGGTGA < 6900  
G Q G R C F G N A T L A K Q K G N F C T K V V K P N R K T N K W V I

TCCCATCTGCGTCTGGGATGTGGGTTTGCCAAAGGTCGGAGTGAGTCTTGTGTGTTCCCTGCCAAATTCATGACTCTACCGATTTCTGTGTCCAAGT < 7000  
P S A S G M W V C Q R S G V S P C V F L A K F N D S T D F C V Q V

**cleavage site Env -- TM**

TCTGATTGTCCCCAGGGTCTTGTACCCTCAGACGAAGAGATATACCATCTTCTCGAAGAACCCTAACAGACTCCACAAAAGGAAATCATCACAGGTATA < 7100  
L I V P R V L Y H S D E E I Y H L L E E P N R L H K R E I I T G I

ACTATCGCAATGCTGCTCGGCCTGGGAGCAGCTGGCAGGCCACGGGTGCTCAGCCATCGCAACCCAACAGCACGGACTCTCTCAGCTGCAAAATGACCA < 7200  
T I A M L L G L G A A G T A T G V S A I A T Q Q H G L S Q L Q M T I

**immunosuppressive domain**

TCGACGAGGACCTGCAGAGGATCGAGAAATCCATCTCTATCTAGAGAAATCAGTCTCTTCGCTTTCAGAAGTAGTTTTACAAAATAGGCGAGGACTGGA < 7300  
D E D L Q R I E K S I S Y L E K S V S S L S E V V L Q N R R G L D

**CX6CC motif**

CCTTTTTCATGCAGCAGGAGGACTGTGTGCAGCCTTGAAGGAGGAATGCTGCTTTTATGCAGATCATAACGGAGTCTGTTAAAGACTCCATGGCAGAA < 7400  
L L F M O O G G L C A A L K E E C C F Y A D H T G V V K D S M A E

CTCCGAGACAGACTGGCTCAGAGAAAAGAGACAGGAAAACCAACAGAGCTGGTTTGAATCCTGGTTCAATCAATCACCTTGGCTCACCACTTTAATTT < 7500  
L R D R L A Q R K R D R E T Q Q S W F E S W F N Q S P W L T T L I S

CCGCCCTGGTAGTCCACTGGCAATACTGCTTTTAGCTATTACCATAGGACCATGCTGCTGAACAACTAGTCTCGTTTGTTCAGGCCGCTCGGAAAG < 7600

A L V G P L A I L L L A I T I G P C L L N K L V S F V Q A R L E R

GGCAAACATTCGTTCATAGGCCACCAACAAATGCTATAAACCAAAAACCTGCAAACACAGTCAGTAGCTAAAGCCTTCAGCACCTGCCTTGAAAAATCTA < 7700  
A N I L F I G H Q Q M L \*

**polypurine tract**

CCCAGATCTACCAAACCACCTTTCCCTTAAACAAGTTACAAGTTTGTACCTCACTCCAGTGCCTATACCTACGACTACCTCATTTTGTATGTGATAAGGAG < 7800

**3'LTR**

GGGGGAGATGTGGTAGATAGGACAGGCGAGCGGAAGATCAGGGATGTCACGGAAAGATAGACCCCTCCCCCCTCTCTCTCCCCACGTTATCTATTAA < 7900

CCCCAGAAGCCCAGAAGAATGTAGCCACACCTGCCCTAGTAAATTTCCACTACCCGACTAACCCTGAGACCCCCAACCCCTCTGACGTAGCAAAG < 8000

ACCCCCAAAACATTTAAACCACGAGATAGGATAATAAACGCTTTTCAACCGTCTGCCATATTGGTGTCTGCGTGTGTTGATTAGCCCGAGTGGCCTGG < 8100

ACGAGACCAGGCCCGCTGCTGCCACCTGAACCAGGTCCCTGGTTGTCTTTCATAAAGGCAACA < 8164

**Table S1.** Other taxa in which *pol-env* sequences highly similar to TgERV-F were found

| Species                                                | % similarity (amino acids) |     | accession number |
|--------------------------------------------------------|----------------------------|-----|------------------|
|                                                        | Pol                        | Env |                  |
| <i>Geospiza fortis</i> (medium ground finch)           | 87                         | 72  | AKZB01067212.1   |
| <i>Zonotrichia albicollis</i> (white-throated sparrow) | 86                         | 59  | ARWJ01028302.1   |
| <i>Pseudopodoces humilis</i> (ground tit)              | 82                         | 49  | ANZD01009211.1   |

**Table S2.** Retroviral reference sequences

| <b>Virus name</b>                                    | <b>Abbrev.</b> | <b>Accession</b> |
|------------------------------------------------------|----------------|------------------|
| Avian leukemia virus                                 | ALV            | AB522906.1       |
| Avian endogenous retrovirus                          | EAV-HP         | AJ623291.1       |
| Human endogenous retrovirus-K (HML2)                 | HERV-K(HML2)   | Y10392.1         |
| Koala retrovirus                                     | KoRV           | AF151794.2       |
| Jaagsiekte sheep retrovirus                          | JSRV           | AF136225.1       |
| Mouse mammary tumor virus                            | MMTV           | D16249.1         |
| Mason Pfizer monkey virus                            | MPMV           | AF033815.1       |
| Python endogenous retrovirus                         | PyERV          | AAN77284.1       |
| Human T-cell leukemia virus 1                        | HTLV-1         | AF033817.1       |
| Baboon endogenous retrovirus                         | BAEV           | P10269.1         |
| Feline leukemia virus                                | FeLV           | M18247.1         |
| Murine leukemia virus (Moloney)                      | MoMLV          | J02255.1         |
| Reticuloendotheliosis virus                          | REV            | FJ439119.1       |
| Equine infectious anemia virus                       | EIAV           | M16575.1         |
| Feline immunodeficiency virus                        | FIV            | M25381.1         |
| Human immunodeficiency virus 1                       | HIV-1          | FJ405080.1       |
| Simian immunodeficiency virus (African green monkey) | SIVagm         | M30931.1         |
| Caprine arthritis encephalitis virus                 | CAEV           | M33677.1         |
| ChiRV1                                               | ChiRV1         | DQ280312.2       |
| Human endogenous retrovirus W                        | HERV-W         | AF135487         |
| Black duck-RV                                        | -              | AY820069.1       |
| Blue tit-RV                                          | -              | AY820077.1       |
| Guineafowl-RV                                        | -              | AY820119.1       |
| Hermit thrush-RV                                     | -              | AY820099.1       |
| Toucanette-RV                                        | -              | AY820092.1       |
| Tragopan-RV                                          | -              | AY820072.1       |
| Taeniopygia guttata alpha-1                          | Tg alpha1      | AC188312.1       |
| Taeniopygia alpha-2                                  | Tg alpha2      | ABQF01114967.1   |
| Taeniopygia alpha-3                                  | Tg alpha2      | ABOF01089922.1   |
